# Supplementary material for: The N,N′-bis(trimethylsilyl)pentafluorobenzamidinate ligand: enhanced ethene oligomerisation with a neutral V(iii) bis(benzamidinate) alkyl catalyst
Source: Royal Society of Chemistry journal article supplement (doi:10.1039/b000397m), 2000-01-01
Supplement: b000397m.doc [file b000397m.doc]

# Supporting material

to: “The N,N’-bis(trimethylsilyl)-pentafluorobenzamidinate ligand; enhanced ethene oligomerisation with a neutral V(III) bis(benzamidinate) alkyl catalyst”

by Brussee, Meetsma, Hessen and Teuben.

## Experimental section

**General.** All vanadium compounds described here are highly air and moisture sensitive, and all experiments were performed under nitrogen atmosphere using standard glovebox, Schlenk and vacuum-line techniques. Benzene-*d*6 (99.6 atom % D, Aldrich) was dried over Na/K alloy and vacuum transferred before use; 1,1,2,2-tetrachloroethene-*d*2 (99.5+ atom % D, Aldrich) was dried on molecular sieves (4Å). Other solvents were distilled from Na/K alloy (diethyl ether, pentane, THF) or Na (toluene) before use. [PhC(NSiMe3)2]Li(THF)1 was prepared according to literature procedures. The synthesis of [PhC(NSiMe3)2]2VR (R = Cl; Me, **5b**) was performed as described in a previous paper.2 Pentafluorobenzonitrile (Aldrich 99%) was used without further purification. Ethene (AGA polymer grade) was passed over a supported copper oxygen scavenger (BASF R 3-11) and molecular sieves (3Å) before being passed to the reactor. NMR spectra were run on Varian Gemini 200, VXR-300 and Unity 500 spectrometers. IR spectra were recorded from Nujol mulls between KBr disks on a Mattson-4020 Galaxy FT-IR spectrometer. GC analyses were performed on a HP 6890 instrument equipped with a HP-1 dimethylpolysiloxane column (19095 Z-123). GPC was performed with a Polymer Laboratories PL-GPC210 instrument at 150oC using 1,2,4-trichlorobenzene solvent and a refractive index detector. Molecular weight data were calculated from conventional calibration curves of polystyrene standards. Elemental analyses were carried out at the Micro-Analytical Department of the University of Groningen. Found values are the average of at least two independent determinations.

**Synthesis of [C6F5C(NSiMe3)2]Li** To a suspension of 10.03 g (0,060 mol) (SiMe3)2NLi in 200 ml of ether, cooled to -40 °C, was added 7.4 ml (0.059 mol) of pentafluorobenzonitrile. The mixture was allowed to warm to room temperature giving a clear pale yellow solution, which was stirred overnight. The resulting solution was used for further reactions. For characterisation solid samples were obtained by evaporating the solvent from an aliquot of the solution. The solid thus obtained contains 0.5 equivalents of ether (by 1H-NMR). 1H-NMR (C6D6, 200 MHz, 25 C):  3.20 (q, 3JHH = 7.1, 2H, C*H*2-ether), 0.98 (t, 3JHH = 7.1, 3H, C*H*3-ether), -0.02 (s, 18H, SiC*H*3). 19F-NMR (C6D6, 188.1 MHz, 25 C):  -144.6 (dd, 3JFF = 24.8 Hz, 4JFF = 7.9 Hz, 2F, *o*-C6*F*5), -160.9 (t, 3JFF = 24.8 Hz, 1F, *p*-C6*F*5), -164.6 (td, 3JFF = 24.8, 4JFF = 7.9 Hz, 2F, *m*-C6*F*5). 13C{1H} -NMR (C6D6, 125.7 MHz, 25 C): 162.2 (s, N*C*N), 142.2 (dm, 1JCF = 243.4 Hz, *m*-*C*6F5), 140.7 (dm, 1JCF = 253.0 Hz, *p*-*C*6F5), 138.0 (dm, 1JCF = 253.0 Hz, *o*-*C*6F5), 119.6 (m, *ipso*-*C*6F5), 65.7 (s, *C*H2-ether), 14.4 (s, *C*H3-ether), 1.1 (s, Si*C*H3). IR (Nujol mull, KBr, cm-1): 1649(m), 1508(s), 1491(s), 1341(m), 1296(w), 1285(w), 1262(m), 1248(s), 1200(w), 1154(w), 1136(w), 1109(s), 1063(w), 988(s), 843(s), 770(m), 748(s), 725(s), 675(w), 638(w), 586(w), 554(w), 496(w).

**Synthesis of [C6F5C(NSiMe3)2]2VCl(THF) (1)** To a suspension of 2.07 g (5.54 mmol) VCl3(THF)3 in 40 ml of THF, cooled at -78 °C, 34.6 ml of a 0.32 M solution of [C6F5C(NSiMe3)2]Li (11.10 mmol) in diethyl ether was added. The reaction mixture was allowed to warm to room temperature yielding a brown solution, which was stirred overnight. After evaporating the solvent the reaction product was stripped of remaining THF by stirring with 15 ml of pentane, which was then removed *in vacuo*. The mixture was extracted with 40 ml of pentane. Concentrating and cooling the extract to -20 °C yielded 2.76 g (3.19 mmol, 58%) of (**1**) as green crystals. 1H-NMR (C6D6, 200 MHz):  2.61 (½ = 30 Hz, 4 H, -THF), 0.86 (½ = 10 Hz, 4 H, -THF), 0.47 (½ = 96 Hz, 36 H, SiMe3). 19F-NMR (C6D6, 188.1 MHz, 25 C):  -89.5 (½ = 1700 Hz, 2F, *o*-C6*F*5), -144.7 (½ = 75 Hz, 2F, *m*-C6*F*5), -157.6 (½ = 50 Hz, 1F, *p*-C6*F*5). IR (Nujol mull, KBr, cm-1): 1653(m), 1599(w), 1522(s), 1499(s), 1422(s), 1300(m), 1250(s), 1175(w), 1115(s), 1074(m), 1017(m), 993(s), 955(w), 920(w), 841(s), 756(m), 719(s), 694(m), 642(w), 586(w), 538(m), 463(m). El. Anal. Calcd (Found) for C30H44ClF10N4OSi4V: C 41.64 (42.87), H 5.12 (5.45), N 6.47 (6.11), Cl 4.10 (3.87). The C and H analyses are somewhat too high relative to the calculated values. This appears to be due to residual pentane solvent occluded in the crystals (about 0.3 equiv by NMR) and that was diffcult to remove by drying *in vacuo*.

**Synthesis of [C6F5C(NSiMe3)2]2VCl (2)** Complex **1** (0.45 g, 0.52 mmol) was heated for 5 h at 120 °C in vacuum (0.01 mmHg). The removal of coordinated THF in **1** results in the formation of orange **2** which was isolated in 58% yield (0.24 g, 0.31 mmol). The compound was recrystallised from pentane. 1H-NMR (C6D6, 200 MHz):  1.30 (½ = 280 Hz, 36 H, SiMe3). 19F-NMR (C6D6, 188.1 MHz, 25 C):  -106.8 (½ = 380 Hz, 2F, *o*-C6*F*5), -144.1 (½ = 85 Hz, 2F, *m*-C6*F*5), -155.3 (½ = 45 Hz, 1F, *p*-C6*F*5). IR (Nujol mull, KBr, cm-1): 1651(m), 1520(s), 1507(s), 1424(m), 1294(m), 1252(s), 1252(s), 1152(w), 1115(s), 1067(w), 1030(w), 1015(m), 991(s), 849(s), 762(m), 752(m), 719(m), 694(m), 638(w), 613(w), 588(m), 556(m, 534(w), 476(m), 461(w). El. Anal. Calcd (Found) for C26H36ClF10N4Si4V: C 39.36 (39.38), H 4.57 (4.58), N 7.06 (6.79), V 6.42 (6.33).

**Synthesis of [C6F5C(NSiMe3)2]2VCl(NCPh) (3a)** To a suspension of [C6F5C(NSiMe3)2]2VCl (**2**) (0.50 g, 0.56 mmol) in pentane (15 ml) benzonitrile (0.1 ml, 0.98 mmol) was added. The colour instantaneously changed from orange to dark green. After removing the volatiles *in vacuo* the residue was recrystallised from ether yielding 0.35 g of **3a** (0.39 mmol, 70%). 1H-NMR (C6D6, 200 MHz):  10.19 (½ = 15 Hz, 2H, Ph), 7.13 (½ = 10 Hz, 3H, Ph), 0.11 (½ = 75 Hz, 36 H, SiMe3). 19F-NMR (C6D6, 188.1 MHz, 25 C): -143.3 (½ = 165 Hz, 2F, *m*-C6*F*5), -156.8 (½ = 50 Hz,1F, *p*-C6*F*5). The *o*-F resonance was not observed, and may be very broad (see e.g. the THF adduct **1**). IR (Nujol mull, KBr, cm-1): 2265(m), 1653(w), 1597(w), 1520(s), 1497(s), 1425(s), 1298(m), 1250(s), 1200(w), 1179(w), 1119(s), 1028(m), 991(s), 845(s), 756(m), 725(s), 694(m), 685(m), 638(w), 586(w), 556(m), 534(m), 496(w), 465(m). El. Anal. Calcd (Found) for C33H41ClF10N5Si4V: C 44.22 (44.24), H 4.61 (4.70), N 7.81 (7.73).

**Synthesis of [Ph(NSiMe3)2]2VCl(NCPh) (3b)** To a suspension of [PhC(NSiMe3)2]2VCl (0.48 g, 0.78 mmol) in pentane (15 ml) benzonitrile (0.1 mL, 0.98 mmol) was added. An instantaneous colour change to dark green was observed. After removing the volatiles *in vacuo* the residue was crystallized from ether yielding 0.31 g of **3b** (0.43 mmol, 55%). 1H-NMR (C6D6, 200 MHz):  10.5 and 10.3 (½ = 30 Hz and 25 Hz, 4H and 1H), 8.71 (½ = 130 Hz, 3H), 7.2 (½ = 40 Hz, overlapping with solvent), 0.62 (½ = 110 Hz, 36 H, SiMe3), -0.35 (½ = 50 Hz, overlapped by previous resonance). Resonances could not be unambiguously assigned. IR (Nujol mull, KBr, cm-1): 2265(m), 1676(w), 1597(w), 1449(s), 1424(s), 1412(s), 1314(w), 1294(w), 1258(m), 1244(s), 1177(m), 1072(w), 1007(m), 995(m), 974(s), 926(w), 914(w), 841(s), 789(m), 758(s), 745(m), 700(m), 685(m) 554(w), 517(m), 444(w). El. Anal. Calcd (Found) for C33H51ClN5Si4V: C 55.32 (55.45), H 7.17 (7.01), N 9.77 (10.60), V 7.11 (7.01) Cl 4.95 (4.99).

**Synthesis of [C6F5C(NSiMe3)2]2VMe(THF) (4)** [C6F5C(NSiMe3)2]2VCl(THF)(**1**) (0.95 g, 1.10 mmol) was dissolved in 20 ml of THF and cooled to –78 °C. To this green solution was added MeMgCl (0.37 ml of a 3 M solution in THF, 1.11 mmol). On warming to room temperature the colour changed to orange-brown. The reaction mixture was stirred for 1 hour before removing the solvent under reduced pressure. The orange solid was stripped of remaining THF by stirring with pentane (10 ml), which was subsequently pumped off. The residue was extracted with 20 ml of pentane. Concentration and cooling to –20 °C yielded 0.52 g (0.61 mmol, 56%) of **4** as orange crystals. 1H-NMR (C6D6, 200 MHz):  4.93 (½ = 85 Hz, 4 H, -THF), 1.59 (½ = 10 Hz, 4 H, -THF), 1.40 (½ = 310 Hz, 36 H, SiMe3). 19F-NMR (C6D6, 188.1 MHz, 25 C):  -103.3 (½ = 500 Hz, 2F, *o*-C6*F*5), -142.6 (½ = 90 Hz, 2F, *m*-C6*F*5), -156.6 (½ = 35 Hz, 1F, *p*-C6*F*5). IR (Nujol mull, KBr, cm-1): 1651(w), 1520(s), 1497(s), 1416(m), 1398(m), 1298(w), 1250(s), 1176(w), 1115(s), 1074(w), 1026(m), 1011(m), 991(s), 910(w), 845(s), 752(m), 723(m), 685(w), 640(w), 598(w), 586(w), 536(w), 469(w), 450(w). El. Anal. Calcd (Found) for C31H47F10N4OSi4V: C 44.06 (44.16), H 5.61 (5.57), N 6.63 (6.41), V 6.03 (5.94).

**Synthesis of [C6F5C(NSiMe3)2]2VMe (5a)** To a solution of [C6F5C(NSiMe3)2]2VCl(**2**) (0.81 g, 1.02 mmol) in 20 ml of ether, cooled to –78 °C, was added MeLi (1.11 ml of a 0.92 M solution in ether, 1.02 mmol). On warming up to room temperature an orange reaction mixture formed, which was stirred for 1 hour before removing the solvent under reduced pressure. The orange solid was stripped of remaining ether by stirring with pentane (10 ml) which was then removed *in vacuo*. The mixture was extracted with 20 ml of pentane. Concentration and cooling to –80 °C yielded 0.41 g (0.53 mmol, 52%) of **5a** as orange crystals. 1H-NMR (C6D6, 200 MHz):  1.83 (½ = 300 Hz, 36 H, SiMe3). 19F-NMR (C6D6, 188.1 MHz, 25 C):  -104.5 (½ = 490 Hz, 2F, *o*-C6*F*5), -142.5 (½ = 80 Hz, 2F, *m*-C6*F*5), -156.6 (½ = 30 Hz, 1F, *p*-C6*F*5). IR (Nujol mull, KBr, cm-1): 1651(w), 1520(s), 1501(s), 1470(s), 1418(m), 1296(w), 1263(m), 1252(s), 1150(w), 1115(s), 1063(w), 1017(w), 991(s), 845(s), 752(m), 723(m), 692(w), 638(w), 588(w), 556(w), 530(w), 478(w). El. Anal. Calcd (Found) for C27H39F10N4Si4V: C 41.96 (42.31), H 5.09 (5.18), N 7.25 (6.89).

**Ethene oligomerisation experiments** In a typical experiment a glass autoclave (Büchi) of 50 ml internal volume, equipped with a Teflon-coated stirbar, was charged inside a glovebox with 0.1 mmol of catalyst (**5a** or **5b**) and 10 ml of toluene. The autoclave was then closed, taken out of the glovebox and placed in a thermostated (80oC) silicone oil bath. After equilibration (15 min), ethene pressure was admitted (4-8 bar) and the reaction was allowed to proceed for 2-16 h under constant ethene pressure. Subsequently the oil bath was removed and the reactor was vented. A small sample was taken for GC analysis and 1 ml of methanol was added to the reaction mixture. The mixture was then poured into methanol, the polymer was recovered by filtration and rinsed repeatedly with methanol, followed by drying *in vacuo* at 80oC overnight. The product was characterised by 1H NMR spectroscopy at 90oC on samples dissolved in C2D2Cl4 and (for the samples with Mn > 1000) by GPC.

Data on the runs described in the text are listed in the table below.

| catalyst | p(ethene)  (bar) | run time  (h) | yield  (g) | productivity (kg mol-1h-1) | Mn | Mw/Mn |
| --- | --- | --- | --- | --- | --- | --- |
| **5a** | 8 | 4 | 3.22 | 8.06 | 1780a | 2.3 |
| **5a** | 4 | 2 | 1.48 | 7.40 |  |  |
| **5a** | 4 | 4 | 1.81 | 4.52 | 1240 a | 2.5 |
| **5a** | 4 | 16 | 2.15 | 1.34 | 1200 a | 2.5 |
| **5b** | 8 | 4 | 0.60 | 1.50 | 850b |  |
| **5b** | 8 | 16 | 2.80 | 1.75 | 750 b |  |
| **5b** | 4 | 16 | 0.84 | 0.52 | 630 b |  |

1. determined by GPC (1,2,4-trichlorobenzene, 150oC)
2. determined by NMR (C2D2Cl4, 90oC)

**Structure determinations.** The details of the crystal structure determinations of **3a** and **3b** have been submitted in CIF-file format to the Editorial Office at chemcomm@rsc.org.

**References.**

1. (a) Sanger, A. R. *Inorg. Nucl. Chem. Lett.* **1973**, *9*, 351. (b) Boeré, R. T.; Oakley, R. T.; Reed, R. W. *J. Organomet. Chem.* **1987**, *331*, 161.
2. Brussee, E. A. C.; Meetsma, A.; Hessen, B.; Teuben, J. H. *Organometallics* **1998**, *17*, 4090.
